# Supplementary material for: Inhibition of the group I mGluRs reduces acute brain damage and improves long-term histological outcomes after photothrombosis-induced ischaemia
Source: PubMed Central journal article supplement (PMC3786425; doi:10.1042/an20130002), 2013-07-11
Supplement: an005e117add.pdf [file an005e117add.pdf]

# Inhibition of the group I mGluRs reduces acute brain damage and improves long-term histological outcomes after photothrombosis-induced ischaemia

Hailong Li\*†, Nannan Zhang\*, Grace Sun‡ and Shinghua Ding†<sup>1</sup>

\*Dalton Cardiovascular Research Center, University of Missouri-Columbia, MO 65211, U.S.A.

†Department of Biological Engineering, University of Missouri-Columbia, MO 65211, U.S.A.

‡Department of Biochemistry, University of Missouri-Columbia, MO 65211, U.S.A.

## SUPPLEMENTARY DATA

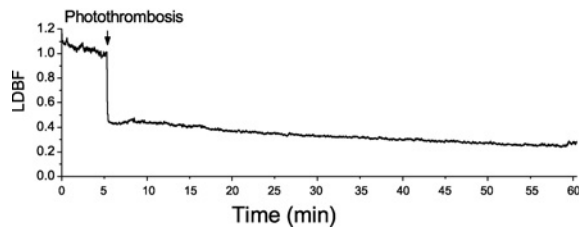

**Figure S1 Cerebral blood flow (CBF) measurement of photothrombosis model with a laser Doppler flowmetry**

In this experiment, photothrombosis was induced by 2 min of light illumination of 12% power output of light source on a region with a diameter of 1.5 mm in the intact skull without skin. CBF was monitored up to 1 h after photothrombosis. Data from each mouse was normalized to the value prior to light illumination. The Figure shows the averaged value of data from five mice.

<sup>1</sup>To whom correspondence should be addressed (email [dings@missouri.edu](mailto:dings@missouri.edu)).

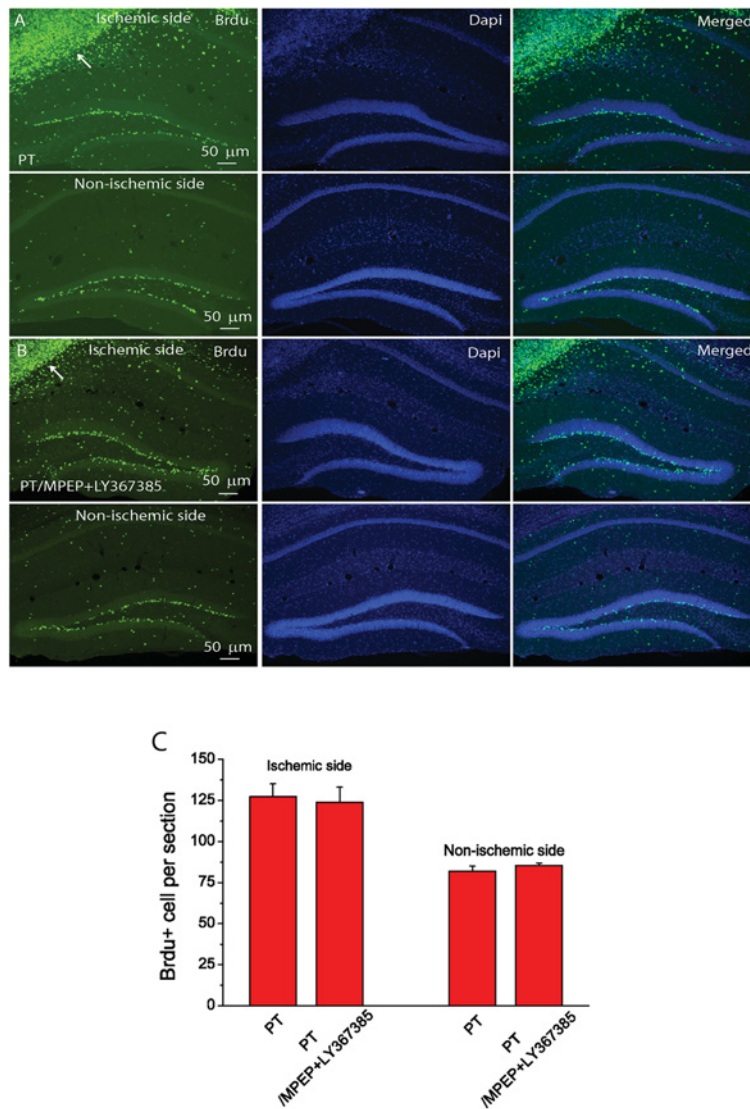

**Figure S2** The effect of MPEP and LY367385 on neurogenesis in the hippocampus 2 weeks after PT (A,B) Fluorescent images of Brdu staining in the dentate gyrus of hippocampus of mice not subject (A) and subject (B) to MPEP and LY367385 injection. (C) Summary of the density of Brdu+ cells in the SGZ of DG. The Brdu injection paradigm is the same as in Figure 6(A) of the main text.
